# Supplementary material for: Zwitterionic Ni(ii) complexes bearing pyrazolyl-ether-imidazolium ligands: synthesis, structural characterization and use in ethylene oligomerization
Source: Royal Society of Chemistry journal article supplement (doi:10.1039/c5nj01538c), 2015-01-01
Supplement: c5nj01538c1.pdf [file c5nj01538c1.pdf]

**Electronic Supplementary Information (ESI) for**

**Zwitterionic Ni(II) Complexes Bearing Pyrazolyl-Ether-  
Imidazolium Ligands: Synthesis, Structural Characterization  
and use in Ethylene Oligomerization**

A. H. D. P. S. Ulbrich,<sup>a</sup> J. L. S. Milani,<sup>a</sup> T. Roisnel,<sup>b</sup> J.-F Carpentier,<sup>c</sup> Osvaldo L. Casagrande Jr.<sup>a,\*</sup>

---

<sup>a</sup> *Laboratory of Molecular Catalysis, Instituto de Química, Universidade Federal do Rio Grande do Sul, Avenida Bento Gonçalves, 9500, RS, 90501-970 (Brazil).*

<sup>b</sup> *Institut des Sciences Chimiques de Rennes, Centre de diffraction X, UMR 6226 CNRS-Université de Rennes 1, F-35042 Rennes Cedex, France.*

<sup>c</sup> *Institut des Sciences Chimiques de Rennes, Organometallics: Materials and Catalysis Dept., UMR 6226 CNRS-Université de Rennes 1, F-35042 Rennes Cedex, France.*

Table S1. Crystallographic data for **L1<sup>PF6</sup>** and **L3<sup>PF6</sup>**.

|                                                               | <b>L1<sup>PF6</sup></b>                                            | <b>L3<sup>PF6</sup></b>                                            |
|---------------------------------------------------------------|--------------------------------------------------------------------|--------------------------------------------------------------------|
| Formula                                                       | C <sub>13</sub> H <sub>21</sub> N <sub>4</sub> O, F <sub>6</sub> P | C <sub>14</sub> H <sub>23</sub> N <sub>4</sub> O, F <sub>6</sub> P |
| CCDC                                                          | 1055620                                                            | 1055623                                                            |
| Mol. wt.                                                      | 394.31                                                             | 408.33                                                             |
| Temperature (K)                                               | 120 (2)                                                            | 100(2)                                                             |
| Crystal System                                                | Triclinic                                                          | Monoclinic                                                         |
| Space group                                                   | P-1                                                                | P 2 <sub>1</sub> /n                                                |
| <i>a</i> (Å)                                                  | 7.3802                                                             | 9.8869 (4)                                                         |
| <i>b</i> (Å)                                                  | 8.3070                                                             | 8.5977 (3)                                                         |
| <i>c</i> (Å)                                                  | 14.538                                                             | 21.7613 (9)                                                        |
| $\alpha$ (°)                                                  | 93.277                                                             | 90 °                                                               |
| $\beta$ (°)                                                   | 99.516                                                             | 94.160 (2) °                                                       |
| $\gamma$ (°)                                                  | 96.900                                                             | 90 °                                                               |
| <i>V</i> (Å <sup>3</sup> )                                    | 870.0 (2)                                                          | 1844.94 (12)                                                       |
| <i>Z</i>                                                      | 2                                                                  | 4                                                                  |
| Density (g/cm <sup>3</sup> )                                  | 1.505                                                              | 1.47                                                               |
| Abs. Coeff., (mm <sup>-1</sup> )                              | 0.228                                                              | 0.218                                                              |
| <i>F</i> (000)                                                | 408                                                                | 848                                                                |
| Crystal size, (mm)                                            | 0.15 x 0.14 x 0.13                                                 | 0.33 x 0.26 x 0.15                                                 |
| $\theta$ range, deg                                           | 3.5 – 27.48 °                                                      | 3,02 – 27.48 °                                                     |
| Limiting indices                                              | -9 ≤ <i>h</i> ≤ 9<br>-10 ≤ <i>k</i> ≤ 10<br>-18 ≤ <i>l</i> ≤ 18    | -9 ≤ <i>h</i> ≤ 12<br>-10 ≤ <i>k</i> ≤ 6<br>-28 ≤ <i>l</i> ≤ 26    |
| Reflections collected/indepent [ <i>R</i> <sub>(int)</sub> ]  | 15450/3980 [ <i>R</i> <sub>(int)</sub> =0.0477]                    | 9900/4181 [ <i>R</i> <sub>(int)</sub> = 0.0343]                    |
| Reflections [ <i>I</i> >2σ]                                   |                                                                    |                                                                    |
| Completeness to $\theta$ (%)                                  | 99.5                                                               | 99.2                                                               |
| Absorption correction type                                    | Multi-scan                                                         | Multi-scan                                                         |
| Max. and min. transmission                                    | 0.971; 0.957                                                       | 0.968; 0.866                                                       |
| Data/ restraints/para.                                        | 3980 / 0 / 232                                                     | 4181 / 0 / 238                                                     |
| Goodness-of-fit                                               | 1.046                                                              | 1.021                                                              |
| <i>R</i> <sub>1</sub> [ <i>I</i> >2σ( <i>I</i> )] (all data)  | 0.0348                                                             | 0.0409                                                             |
| <i>wR</i> <sub>2</sub> [ <i>I</i> >2σ( <i>I</i> )] (all data) | 0.0978                                                             | 0.097                                                              |
| Largest diff. (e·Å <sup>-3</sup> )                            | 0.296 and -0.42                                                    | 0.269 and -0.358                                                   |

Table S2. Crystallographic data for **Ni1**, **Ni2** and **Ni3**.

|                                                                         | <b>Ni1</b>                                                             | <b>Ni2</b>                                                          | <b>Ni3</b>                                                          |
|-------------------------------------------------------------------------|------------------------------------------------------------------------|---------------------------------------------------------------------|---------------------------------------------------------------------|
| Formula                                                                 | 2(C <sub>13</sub> H <sub>21</sub> Cl <sub>3</sub> N <sub>4</sub> Ni O) | C <sub>14</sub> H <sub>19</sub> Cl <sub>3</sub> N <sub>4</sub> Ni O | C <sub>14</sub> H <sub>23</sub> Cl <sub>3</sub> N <sub>4</sub> Ni O |
| CCDC                                                                    | 1055629                                                                | 1055632                                                             | 1406895                                                             |
| Mol. wt.                                                                | 828.8                                                                  | 400.37                                                              | 428.42                                                              |
| Temperature (K)                                                         | 150 (2)                                                                | 150(2)                                                              | 100(2)                                                              |
| Crystal System                                                          | Orthorhombic                                                           | Monoclinic                                                          | Monoclinic                                                          |
| Space group                                                             | Pc2 <sub>1</sub> b                                                     | P 2 <sub>1</sub> /c                                                 | P 2 <sub>1</sub> /n                                                 |
| <i>a</i> (Å)                                                            | 8.1781(2)                                                              | 13.3573 (4)                                                         | 8.08500(10)                                                         |
| <i>b</i> (Å)                                                            | 15.6069(3)                                                             | 7.7215 (2)                                                          | 17.5163(3)                                                          |
| <i>c</i> (Å)                                                            | 28.0616(6)                                                             | 17.1025 (4)                                                         | 13.4475(2)                                                          |
| $\alpha$ (°)                                                            | 90                                                                     | 90                                                                  | 90                                                                  |
| $\beta$ (°)                                                             | 90                                                                     | 104.3550 (10)                                                       | 99.5100(10)                                                         |
| $\gamma$ (°)                                                            | 90                                                                     | 90                                                                  | 90                                                                  |
| <i>V</i> (Å <sup>3</sup> )                                              | 3581.64(14)                                                            | 1708.85 (8)                                                         | 1878.25(5)                                                          |
| <i>Z</i>                                                                | 4                                                                      | 4                                                                   | 4                                                                   |
| Density (g/cm <sup>3</sup> )                                            | 1.537                                                                  | 1.556                                                               | 1.515                                                               |
| Abs. Coeff., (mm <sup>-1</sup> )                                        | 1.536                                                                  | 1.607                                                               | 1.467                                                               |
| <i>F</i> (000)                                                          | 1712                                                                   | 824                                                                 | 888                                                                 |
| Crystal size, (mm)                                                      | 0.28 x 0.18 x 0.07                                                     | 0.38 x 0.29 x 0.13                                                  | 0.26 x 0.19 x 0.09                                                  |
| $\theta$ range, deg                                                     | 3.56 – 27.44°                                                          | 1.57 – 27.49                                                        | 2.99 – 27.48                                                        |
| Limiting indices                                                        | -10 ≤ <i>h</i> ≤ 10<br>-20 ≤ <i>k</i> ≤ 20<br>-36 ≤ <i>l</i> ≤ 36      | -17 ≤ <i>h</i> ≤ 17<br>-9 ≤ <i>k</i> ≤ 10<br>-22 ≤ <i>l</i> ≤ 22    | -10 ≤ <i>h</i> ≤ 10<br>-22 ≤ <i>k</i> ≤ 22<br>-17 ≤ <i>l</i> ≤ 13   |
| Reflections collected/indepent                                          | 54557 / 8156                                                           | 14787 / 3902                                                        | 15723 / 4278                                                        |
| [ <i>R</i> <sub>(int)</sub> ]                                           | [ <i>R</i> (int) = 0.0338]                                             | [ <i>R</i> (int) = 0.0417]                                          | [ <i>R</i> (int) = 0.0251]                                          |
| Completeness to $\theta$ (%)                                            | 99.7                                                                   | 99.7                                                                | 99.1                                                                |
| Absorption correction type                                              | Multi-scan                                                             | Multi-scan                                                          | Multi-scan                                                          |
| Max. and min. transmission                                              | 0.898; 0.767                                                           | 0.811; 0.685                                                        | 0.876 ; 0.695                                                       |
| Data/ restraints/para.                                                  | 8156 / 1 / 403                                                         | 3092/ 0 / 194                                                       | 4278 / 0 / 212                                                      |
| Goodness-of-fit                                                         | 1.034                                                                  | 1.019                                                               | 1.021                                                               |
| <i>R</i> <sub>1</sub> [ <i>I</i> > 2 $\sigma$ ( <i>I</i> )] (all data)  | 0.0192                                                                 | 0.0279                                                              | 0.0258                                                              |
| <i>wR</i> <sub>2</sub> [ <i>I</i> > 2 $\sigma$ ( <i>I</i> )] (all data) | 0.0467                                                                 | 0.0678                                                              | 0.0638                                                              |
| Largest diff. (e·Å <sup>-3</sup> )                                      | 0.293 and -0.191                                                       | 0.286 and -0.267                                                    | 0.777 e -0.285                                                      |
